# Supplementary figures and images for: Pharmacokinetic, Biodistribution, and toxicity Study of Boronophenylalanine in hepatocellular carcinoma cells and Tumor- Bearing Mouse Model
Source: Research Square preprint supplement (doi:10.21203/rs.3.rs-6184213/v1), 2025-05-05

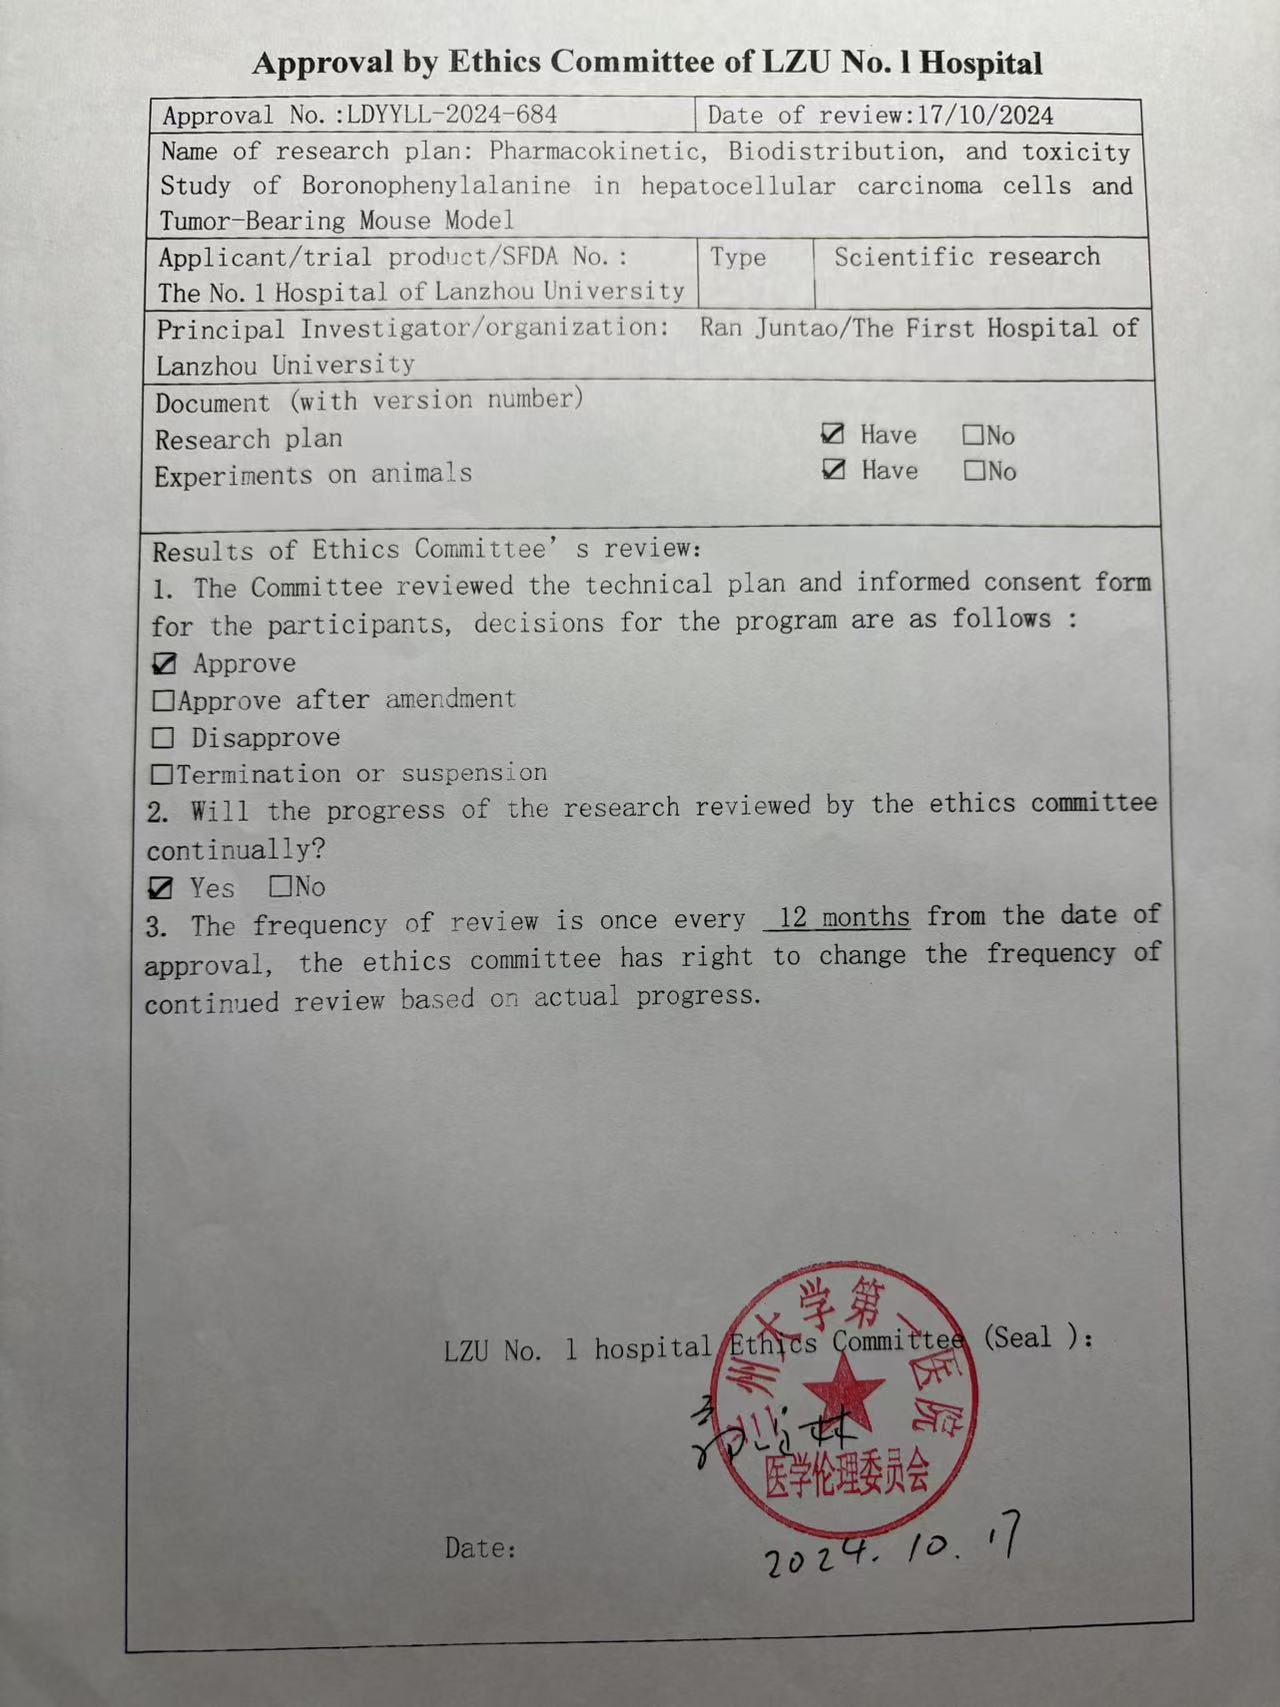

Supplement: Supplementary file 1 [file 9beb08f68d50f6926f147d42.docx]
